# Supplementary material
Source: Springer Nature journal article supplement (https://www.springermedizin.de/resource/supplementary/13229_2014_148_MOESM5_ESM.pdf/9676288)

A)

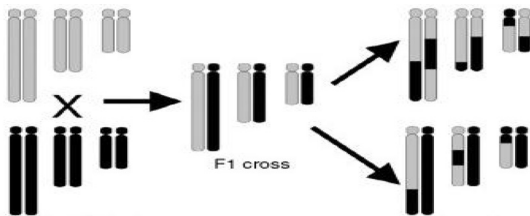

B)

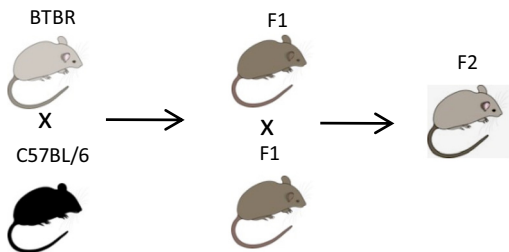

C)

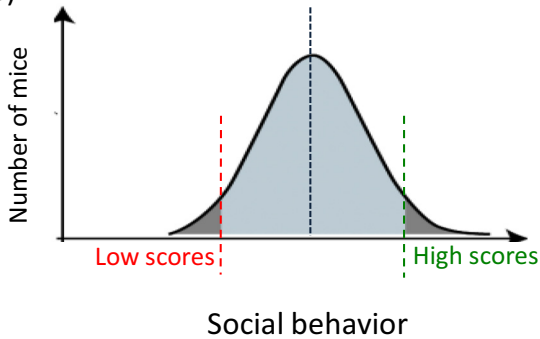

Supplement: MOESM5 [file 9676288]
